# Supplementary material for: PKCiota Inhibits the Ferroptosis of Esophageal Cancer Cells via Suppressing USP14-Mediated Autophagic Degradation of GPX4
Source: MDPI journal article supplement (doi:10.3390/antiox13010114), 2024-01-17
Supplement: s1 [file s1]

### Supplement figure legends

**Figure S1. RSL3 treatment decreased the mRNA level of PKC $\alpha$  in KYSE510 and KYSE450 cells.** \*\*,  $p < 0.01$ ; \*\*\*,  $p < 0.001$ .

**Figure S2. FIN56 treatment decreased the protein level of PKC $\alpha$  but Erastin treatment had no effect on the protein level of PKC $\alpha$  in KYSE510 and KYSE450 cells.** 0, 10, 20 and 40  $\mu$ M of FIN56 and 0, 20, 40 and 80  $\mu$ M of Erastin were used to treat the ESCC cells.

**Figure S3. Silence PKC $\alpha$  had no effect on the mRNA level of GPX4 in KYSE510 and KYSE450 cells.** ns, not significant.

**Figure S4. miR-145-5p was decreased in ESCC.** Transcript levels of miR-145-5p in normal tissues and ESCC tissues from GSE43732, GSE114110 and GSE145198. \*,  $p < 0.05$ ; \*\*\*\*,  $p < 0.0001$ .
