# Supplementary material for: PKCiota Inhibits the Ferroptosis of Esophageal Cancer Cells via Suppressing USP14-Mediated Autophagic Degradation of GPX4
Source: Antioxidants (Basel). 2024 Jan 17;13(1):114. doi: 10.3390/antiox13010114 (PMC10812620; doi:10.3390/antiox13010114)
Supplement: Supplementary file 1 [file antioxidants-13-00114-s001.zip]

Archive with 13 entries (13 files):
- Figure S1.pdf
- Figure S2.pdf
- Figure S3.pdf
- Figure S4.pdf
- Supplement figure legends.pdf
- Table S1.xlsx
- Table S2.xlsx
- Table S3.xlsx
- Table S4.xlsx
- Table S5.xlsx
- Table S6.xlsx
- Table S7.xlsx
- Table S8.xlsx
