# Supplementary material for: PKCiota Inhibits the Ferroptosis of Esophageal Cancer Cells via Suppressing USP14-Mediated Autophagic Degradation of GPX4
Source: Antioxidants (Basel). 2024 Jan 17;13(1):114. doi: 10.3390/antiox13010114 (PMC10812620; doi:10.3390/antiox13010114)
Supplement: Supplementary file 1 [file antioxidants-13-00114-s001.zip › Table S1.xlsx]

## Sheet: Table S1
Table S1. The sequences of siRNAs
NO.	Sequence name	Sequence (5'-3')	Gene	Accession number
1	PKCiota si1	CUUCCUGAAGAACAUGCCATT	PKCiota	NM_002740
2	PKCiota si2	GGUAAUAGGAAGAGGAAGUTT	PKCiota	NM_002740
3	miR-145-5p mimic	GUCCAGUUUUCCCAGGAAUCCCU	miR-145-5p	NR_029686
4	USP14 si	GGAGAAAUUUGAAGGUGUA	USP14	NM_005151
5	GPX4 si1	CAGGGAGUAACGAAGAGAUTT	GPX4	NM_002085
6	GPX4 si2	UGGUGAUAGAGAAGGACCUTT	GPX4	NM_002085
7	CANX si	GAGCTTGATCTGTGATTTC	CANX	NM_001746
8	Negative control siRNA	UUCUCCGAAC GUGUCACGUTT	NA	NA
