# Supplementary material for: PKCiota Inhibits the Ferroptosis of Esophageal Cancer Cells via Suppressing USP14-Mediated Autophagic Degradation of GPX4
Source: Antioxidants (Basel). 2024 Jan 17;13(1):114. doi: 10.3390/antiox13010114 (PMC10812620; doi:10.3390/antiox13010114)
Supplement: Supplementary file 1 [file antioxidants-13-00114-s001.zip › Table S2.xlsx]

## Sheet: Table S2
Table S2. The information of primers
Gene	Accession number	Forward primer	Reverse primer	Product size
PKCiota	NM_002740	AGGTCCGGGTGAAAGCCTA	TGAAGAGCTGTTCGTTGTCAAA	126
GPX4	NM_002085	GAGGCAAGACCGAAGTAAACTAC	CCGAACTGGTTACACGGGAA	100
SOX2	NM_003106	GCCGAGTGGAAACTTTTGTCG	GGCAGCGTGTACTTATCCTTCT	155
CANX	NM_001746	CCAAGGTTACTTACAAAGCTCCA	GGCCCGAGACATCAACACA	212
BMP4	NM_001202	AAAGTCGCCGAGATTCAGGG	GACGGCACTCTTGCTAGGC	135
GAPDH	NM_002046	AAATCCCATCACCATCTTCCAG	GAGTCCTTCCACGATACCAAAGTTG	310
