# Supplementary material for: PKCiota Inhibits the Ferroptosis of Esophageal Cancer Cells via Suppressing USP14-Mediated Autophagic Degradation of GPX4
Source: Antioxidants (Basel). 2024 Jan 17;13(1):114. doi: 10.3390/antiox13010114 (PMC10812620; doi:10.3390/antiox13010114)
Supplement: Supplementary file 1 [file antioxidants-13-00114-s001.zip › Table S3.xlsx]

## Sheet: Table S3
Table S3. Differentially expressed genes (DEGs) at the downstream of GPX4 were identified by using RNA-seq method
NO.	Gene Name	Up/Down	FC (si1 VS NC)	FC (si2 VS NC)
1	AC008760.2	up	25.6882	52.523
2	AC106037.2	up	23.7122	14.7065
3	AC004034.1	up	19.7601	16.8074
4	CRYBB3	up	17.7841	18.9083
5	RPLP1P13	up	17.7841	18.9083
6	AC090181.2	up	16.7961	13.656
7	AC008735.4	up	15.8081	18.9083
8	RNU6-1238P	up	15.8081	14.7065
9	AC123768.5	up	14.8201	12.6055
10	AC020911.1	up	13.8321	16.8074
11	AC016747.3	up	11.8561	18.9083
12	AC079061.1	up	11.8561	12.6055
13	APOA1-AS	up	11.8561	12.6055
14	DSTNP1	up	11.8561	25.2111
15	GRIP1	up	11.8561	12.6055
16	HMGN1P8	up	10.8681	8.40369
17	LINC01348	up	10.3741	7.35323
18	AC004765.1	up	9.88007	10.5046
19	AL031777.3	up	9.88007	11.5551
20	AC009996.1	up	8.89206	13.656
21	ADCY10	up	8.89206	9.45415
22	AL589935.1	up	7.90405	11.5551
23	BIRC6-AS2	up	7.90405	25.2111
24	SNORA22	up	7.90405	8.40369
25	LINC00618	up	7.41005	4.72707
26	CCDC58P3	up	6.91605	6.30277
27	AL139147.1	up	6.42204	13.656
28	AC004830.1	up	6.25738	6.30277
29	MYLK2	up	5.43404	6.30277
30	CD36	up	4.94003	4.72707
31	COL5A2	up	4.94003	4.90215
32	AC090616.6	up	4.6107	5.2523
33	RSPH9	up	4.6107	5.60246
34	SUMO4	up	4.6107	3.85169
35	MCCC1-AS1	up	4.28136	3.85169
36	ST13P5	up	4.28136	4.90215
37	AC093525.9	up	3.95203	6.30277
38	SEC22B4P	up	3.95203	6.30277
39	SNORA66	up	3.78736	4.20184
40	ACTR3C	up	3.75443	3.04634
41	HABP4	up	3.75243	2.44046
42	RMDN2	up	3.5678	2.45108
43	AL031777.1	up	3.45802	6.30277
44	PLAC4	up	3.34402	2.377
45	CP	up	3.24631	3.45151
46	CDK14	up	3.21102	2.39636
47	SPON1	up	3.10516	2.70119
48	TXNDC5	up	3.0738	2.45108
49	SPDYE5	up	2.96402	5.4624
50	ZNF887P	up	2.85424	2.91795
51	AC090607.2	up	2.84052	2.88877
52	GCSAM	up	2.79935	5.42738
53	GANAB	up	2.77702	2.38558
54	TOMM22	up	2.76061	2.39057
55	SNORA11F	up	2.71702	2.75746
56	SNORA14B	up	2.68173	2.85125
57	FGFR2	up	2.63468	4.08513
58	ZNF416	up	2.61688	2.21449
59	PRDX4	up	2.59914	3.08991
60	TNFRSF10A-AS1	up	2.52491	3.96841
61	AC009686.2	up	2.47002	2.31101
62	FAM13C	up	2.47002	2.62615
63	HMGB1P10	up	2.47002	4.05178
64	ZNF141	up	2.42511	3.15138
65	ZNF836	up	2.42511	3.48562
66	UBAP1L	up	2.41513	2.68451
67	B4GALT1	up	2.39406	2.40585
68	HDGFL2	up	2.39083	2.04823
69	THOC7	up	2.39024	2.23141
70	DIABLO	up	2.34652	2.29788
71	ZNF585A	up	2.33529	2.32375
72	LMTK3	up	2.30535	2.03726
73	HIST1H2BF	up	2.29038	3.39012
74	TLK2P1	up	2.28477	2.10092
75	CARNMT1	up	2.25115	4.16195
76	SPDYA	up	2.18401	2.93023
77	POLH-AS1	up	2.14784	2.74033
78	AL117379.1	up	2.14068	2.10092
79	AL353625.1	up	2.13623	2.89587
80	MMP13	up	2.06193	4.20184
81	PAFAH1B2	up	2.04446	2.64344
82	NOLC1	up	2.02324	2.03456
83	PEG10	up	2.00978	2.00039
84	KANK3	down	0.0380003	0.161609
85	TMEM231P1	down	0.0380003	0.242414
86	AXDND1	down	0.0411669	0.0437692
87	AL008729.1	down	0.0449094	0.0477482
88	AC004817.3	down	0.0494003	0.052523
89	LCNL1	down	0.0494003	0.262615
90	AC026748.1	down	0.0548893	0.0583589
91	SERPINA1	down	0.0548893	0.116718
92	AL121603.2	down	0.058118	0.308959
93	MATN4	down	0.058118	0.185375
94	AC004889.1	down	0.0617504	0.262615
95	ACTBL2	down	0.0617504	0.131308
96	PCDHB8	down	0.0617504	0.0656538
97	SOX2	down	0.0617504	0.131308
98	AC004877.2	down	0.0658671	0.280123
99	AC004877.1	down	0.0705719	0.0750329
100	AC007906.2	down	0.0705719	0.150066
101	AC026803.1	down	0.0705719	0.0750329
102	AC145422.1	down	0.0705719	0.0750329
103	AC148477.4	down	0.0705719	0.225099
104	AL033381.1	down	0.0705719	0.0750329
105	AP000787.1	down	0.0705719	0.0750329
106	APBB1IP	down	0.0705719	0.150066
107	BX842568.2	down	0.0705719	0.0750329
108	CCDC33	down	0.0705719	0.150066
109	GNRHR	down	0.0705719	0.0750329
110	HOXB4	down	0.0705719	0.0750329
111	ITGBL1	down	0.0705719	0.0750329
112	LINC01085	down	0.0705719	0.150066
113	LINC01647	down	0.0705719	0.150066
114	MIR6719	down	0.0705719	0.0750329
115	RARRES1	down	0.0705719	0.150066
116	SLX1B-SULT1A4	down	0.0705719	0.150066
117	TMEM125	down	0.0705719	0.150066
118	AC020898.1	down	0.0760005	0.0808047
119	FOXH1	down	0.0760005	0.323219
120	AC004039.1	down	0.0823339	0.262615
121	AC139887.3	down	0.0823339	0.0875384
122	AF230666.1	down	0.0823339	0.0875384
123	AL021407.1	down	0.0823339	0.0875384
124	AL049629.1	down	0.0823339	0.175077
125	AL159169.2	down	0.0823339	0.0437692
126	APOBR	down	0.0823339	0.0875384
127	ASIC4	down	0.0823339	0.0875384
128	HOMER3-AS1	down	0.0823339	0.0875384
129	INTS6L	down	0.0823339	0.0875384
130	IP6K3	down	0.0823339	0.0875384
131	LINC01115	down	0.0823339	0.0875384
132	LIX1-AS1	down	0.0823339	0.0875384
133	SLC9B1	down	0.0823339	0.0875384
134	SNORA31	down	0.0823339	0.0875384
135	EBF3	down	0.0898188	0.190993
136	KCNT1	down	0.0898188	0.190993
137	RN7SKP97	down	0.0898188	0.0954964
138	TM4SF1-AS1	down	0.0898188	0.40586
139	WAS	down	0.0898188	0.0477482
140	TMEM198	down	0.0940959	0.200088
141	GPX4	down	0.0978766	0.0935118
142	CCNA1	down	0.0988007	0.210092
143	CT45A5	down	0.0988007	0.105046
144	FAM238C	down	0.0988007	0.052523
145	TAT	down	0.0988007	0.210092
146	AC008443.4	down	0.109779	0.0583589
147	ECEL1P1	down	0.109779	0.0583589
148	GIMAP2	down	0.109779	0.116718
149	LINC01637	down	0.109779	0.420184
150	SNORD3B-1	down	0.109779	0.116718
151	CYS1	down	0.114001	0.282816
152	SH2D1B	down	0.114001	0.444426
153	KRTAP5-AS1	down	0.116236	0.123584
154	PTENP1	down	0.116236	0.123584
155	BAAT	down	0.123501	0.131308
156	FUT2	down	0.123501	0.328269
157	RAP2C-AS1	down	0.123501	0.131308
158	SPINK4	down	0.123501	0.0656538
159	SSPO	down	0.123501	0.0656538
160	ID2-AS1	down	0.127485	0.169429
161	AC006483.2	down	0.141144	0.150066
162	AC025164.1	down	0.141144	0.0750329
163	AC239803.3	down	0.141144	0.450198
164	AL603839.3	down	0.141144	0.0375165
165	CALML4	down	0.141144	0.150066
166	LINC01669	down	0.141144	0.150066
167	PLCL1	down	0.141144	0.0375165
168	SEPT7P6	down	0.141144	0.350154
169	APLN	down	0.146371	0.350154
170	PPM1L	down	0.146371	0.311248
171	RAB37	down	0.148201	0.210092
172	SYP	down	0.148201	0.315138
173	LINC00322	down	0.149698	0.477482
174	C1orf137	down	0.152001	0.161609
175	FBXL13	down	0.152001	0.323219
176	ALG1L9P	down	0.158081	0.294129
177	AL121992.1	down	0.164668	0.175077
178	CORO1A	down	0.164668	0.175077
179	EPHA10	down	0.164668	0.0875384
180	FGF11	down	0.164668	0.262615
181	RTEL1	down	0.164668	0.233436
182	AC040173.1	down	0.174354	0.370751
183	SCAMP5	down	0.174354	0.0308959
184	AC005534.1	down	0.179638	0.190993
185	AC024940.2	down	0.179638	0.190993
186	ADORA1	down	0.179638	0.0477482
187	AFF3	down	0.179638	0.0954964
188	AL513485.1	down	0.179638	0.0477482
189	CRB2	down	0.179638	0.190993
190	TMC3	down	0.179638	0.190993
191	AC022107.1	down	0.185251	0.295442
192	AL391834.2	down	0.185251	0.196961
193	GOLGA7B	down	0.191227	0.304972
194	POLR3GL	down	0.194818	0.384676
195	BCDIN3D-AS1	down	0.197601	0.480211
196	CD7	down	0.197601	0.210092
197	FOXN4	down	0.197601	0.210092
198	RAG1	down	0.197601	0.140061
199	TMEM86A	down	0.197601	0.105046
200	CCNI2	down	0.205835	0.0437692
201	AL662844.4	down	0.208001	0.387012
202	DMBT1	down	0.208001	0.276437
203	MAP3K14-AS1	down	0.208001	0.248793
204	AC097461.1	down	0.211716	0.150066
205	SATB1	down	0.212801	0.323219
206	FAM86C2P	down	0.217361	0.462203
207	BHLHE40-AS1	down	0.219557	0.0291795
208	BDKRB2	down	0.223098	0.0677717
209	PIK3AP1	down	0.228002	0.0404023
210	TTYH2	down	0.230535	0.210092
211	AC137767.1	down	0.232472	0.308959
212	ACTL10	down	0.232472	0.123584
213	OGFOD2	down	0.232472	0.308959
214	KDM4D	down	0.237122	0.336147
215	AC093734.1	down	0.247002	0.262615
216	ACTN3	down	0.247002	0.196961
217	LINC02062	down	0.247002	0.0437692
218	PRKCG	down	0.247002	0.0328269
219	RPS6KL1	down	0.247002	0.175077
220	SEMA3B-AS1	down	0.247002	0.328269
221	CHRM4	down	0.252257	0.491705
222	AL122010.1	down	0.25615	0.427966
223	SPACA6P-AS	down	0.260002	0.276437
224	FCGBP	down	0.263468	0.350154
225	NBPF25P	down	0.263468	0.32681
226	CRB1	down	0.266002	0.202012
227	FAM86JP	down	0.269456	0.413818
228	AC025171.3	down	0.273278	0.447005
229	EGR3	down	0.275346	0.361634
230	LINC00467	down	0.279219	0.456722
231	OPRL1	down	0.282288	0.150066
232	CTAGE4	down	0.286002	0.387012
233	LCA5L	down	0.286002	0.497587
234	AL355994.2	down	0.29059	0.0617918
235	SPATA6	down	0.292743	0.233436
236	ZNF599	down	0.2943	0.268203
237	AC097103.2	down	0.296402	0.350154
238	THAP7-AS1	down	0.296402	0.052523
239	HNRNPA1P38	down	0.304002	0.242414
240	AC005829.1	down	0.308752	0.328269
241	ZC2HC1C	down	0.316162	0.336147
242	DISP3	down	0.317574	0.0750329
243	SLC6A3	down	0.317574	0.300132
244	SPX	down	0.320288	0.484828
245	CYFIP2	down	0.323657	0.452785
246	SPINK5	down	0.324289	0.331518
247	AC005696.1	down	0.329336	0.245108
248	AC092117.1	down	0.329336	0.280123
249	AL359513.1	down	0.329336	0.350154
250	APOM	down	0.329336	0.025011
251	ARHGAP25	down	0.329336	0.262615
252	CDK5R2	down	0.329336	0.210092
253	NOP2	down	0.329336	0.350154
254	RIDA	down	0.331087	0.363191
255	ABO	down	0.334647	0.186372
256	NPHS1	down	0.339627	0.328269
257	MASP1	down	0.340133	0.430517
258	FAM86FP	down	0.340692	0.398451
259	C5orf56	down	0.342002	0.484828
260	EXTL3-AS1	down	0.343654	0.365378
261	AC018521.5	down	0.345802	0.315138
262	PHF7	down	0.348708	0.391348
263	PRDM8	down	0.348708	0.370751
264	PLEKHA4	down	0.351291	0.490215
265	STMN3	down	0.353433	0.170807
266	VGF	down	0.360489	0.255518
267	CANX	down	0.361605	0.432087
268	LINC01133	down	0.36175	0.471467
269	RGMA	down	0.364002	0.304081
270	SCN4A	down	0.364002	0.294866
271	TSSK6	down	0.365133	0.388214
272	BREA2	down	0.365928	0.466871
273	NDUFA6-DT	down	0.366974	0.300132
274	AVPR2	down	0.370502	0.393923
275	PIGZ	down	0.373023	0.418041
276	CHRNA4	down	0.37384	0.255518
277	RARRES3	down	0.374761	0.326005
278	RASSF4	down	0.374761	0.0362228
279	CHRNA3	down	0.376383	0.300132
280	UNC5A	down	0.376383	0.400176
281	P3H2-AS1	down	0.382454	0.474402
282	AC044860.1	down	0.384225	0.379333
283	AL033527.3	down	0.384225	0.0583589
284	BMP4	down	0.384225	0.486324
285	RGL1	down	0.384225	0.233436
286	AL357079.1	down	0.389215	0.477482
287	ANKRD34A	down	0.390607	0.488586
288	SNED1	down	0.394609	0.488953
289	AC007255.1	down	0.395203	0.315138
290	PLEKHB1	down	0.395203	0.157569
291	RPS18P12	down	0.395203	0.105046
292	TMEM8B	down	0.395203	0.405178
293	ZBED5-AS1	down	0.395203	0.3414
294	RHBDL3	down	0.398669	0.368583
295	DNAAF3	down	0.399407	0.447005
296	RIBC2	down	0.400102	0.40803
297	TBC1D7	down	0.401821	0.46743
298	LUM	down	0.404185	0.381986
299	ST6GALNAC2	down	0.404185	0.0954964
300	AC136475.2	down	0.40883	0.398451
301	AL031282.2	down	0.40883	0.25356
302	ART1	down	0.40883	0.326005
303	GLTPD2	down	0.40883	0.289782
304	LYPD8	down	0.40883	0.217337
305	HAS3	down	0.409661	0.486799
306	SAXO2	down	0.411669	0.262615
307	SMIM5	down	0.411669	0.262615
308	TOMM40L	down	0.411669	0.306384
309	DGCR5	down	0.41214	0.378166
310	FBXO48	down	0.41335	0.225099
311	PTGES2-AS1	down	0.414325	0.440516
312	LENG9	down	0.417016	0.46384
313	PTGES3L	down	0.417158	0.396841
314	ATP8B2	down	0.418493	0.373368
315	FSTL1	down	0.42165	0.286433
316	AL158206.1	down	0.423431	0.400176
317	C7orf31	down	0.423431	0.450198
318	CACTIN-AS1	down	0.423431	0.400176
319	ALG1L6P	down	0.426199	0.370751
320	OTUD7A	down	0.426639	0.262615
321	AP002851.1	down	0.427246	0.283908
322	AC243964.2	down	0.429568	0.456722
323	AL606763.1	down	0.429568	0.182689
324	LTF	down	0.430419	0.447226
325	LINC00319	down	0.43067	0.323219
326	AC107419.1	down	0.432253	0.42675
327	GPR17	down	0.432253	0.492404
328	AC009299.2	down	0.433759	0.384315
329	EXOC3L1	down	0.434723	0.0420184
330	VTN	down	0.434723	0.210092
331	COL5A3	down	0.435885	0.370751
332	MYO1A	down	0.437003	0.181811
333	RAET1K	down	0.437003	0.424225
334	ANO2	down	0.438554	0.348367
335	NMRAL2P	down	0.441378	0.454839
336	PLCH2	down	0.441893	0.283669
337	LINC02086	down	0.444603	0.498969
338	EGR1	down	0.444674	0.365356
339	TMEM205	down	0.445572	0.329556
340	EXOC3L4	down	0.446633	0.402916
341	BTBD8	down	0.449094	0.254657
342	AC068587.4	down	0.45166	0.480211
343	AC010186.2	down	0.452836	0.437692
344	MAPK4	down	0.454483	0.301132
345	DHX58	down	0.456003	0.444426
346	ABCG2	down	0.458206	0.350154
347	P2RX1	down	0.460574	0.323826
348	AL353150.1	down	0.463128	0.393923
349	VSIR	down	0.464193	0.43241
350	DSCAM-AS1	down	0.464559	0.271311
351	SECTM1	down	0.465319	0.372744
352	MID1IP1-AS1	down	0.466559	0.379333
353	FAM151B	down	0.470479	0.425187
354	EGR2	down	0.472525	0.433886
355	CA13	down	0.474243	0.476209
356	SDC3	down	0.475797	0.276165
357	TMEM143	down	0.478725	0.465668
358	LINC02593	down	0.479033	0.230783
359	FCMR	down	0.481337	0.404023
360	AC073107.1	down	0.483493	0.379954
361	SIMC1	down	0.485337	0.276437
362	MEGF8	down	0.487358	0.461637
363	AL121832.2	down	0.494003	0.210092
364	PCP2	down	0.494003	0.494335
365	PTP4A3	down	0.494003	0.355303
