# Supplementary material for: PKCiota Inhibits the Ferroptosis of Esophageal Cancer Cells via Suppressing USP14-Mediated Autophagic Degradation of GPX4
Source: Antioxidants (Basel). 2024 Jan 17;13(1):114. doi: 10.3390/antiox13010114 (PMC10812620; doi:10.3390/antiox13010114)
Supplement: Supplementary file 1 [file antioxidants-13-00114-s001.zip › Table S4.xlsx]

## Sheet: Table S4
Table S4. GO annotation of differentially expressed genes after GPX4 knockdown in ESCC cells
Category	Term	Count	p Value	Genes
GOTERM_BP_DIRECT	GO:0035814~negative regulation of renal sodium excretion	3	0.000880919	AVPR2, ADORA1, SPX
GOTERM_BP_DIRECT	GO:0060349~bone morphogenesis	4	0.00311754	MMP13, ACTN3, FGFR2, LTF
GOTERM_BP_DIRECT	GO:0003084~positive regulation of systemic arterial blood pressure	3	0.00653587	AVPR2, ADORA1, SPX
GOTERM_BP_DIRECT	GO:0070848~response to growth factor	3	0.0111156	SOX2, LUM, TBC1D7
GOTERM_BP_DIRECT	GO:0034220~ion transmembrane transport	6	0.0119273	CHRNA3, ATP8B2, CHRNA4, TMC3, SLC9B1, ANO2
GOTERM_BP_DIRECT	GO:0048168~regulation of neuronal synaptic plasticity	3	0.0138037	EGR2, VGF, SYP
GOTERM_BP_DIRECT	GO:0030198~extracellular matrix organization	6	0.0176789	MMP13, PRDX4, B4GALT1, COL5A3, COL5A2, SPINK5
GOTERM_BP_DIRECT	GO:0007160~cell-matrix adhesion	5	0.0184971	VTN, SNED1, COL5A3, ITGBL1, TMEM8B
GOTERM_BP_DIRECT	GO:1900159~positive regulation of bone mineralization involved in bone maturation	2	0.0189111	ACTN3, LTF
GOTERM_BP_DIRECT	GO:0060079~excitatory postsynaptic potential	4	0.0211805	CHRNA3, CHRNA4, P2RX1, ADORA1
GOTERM_BP_DIRECT	GO:0060976~coronary vasculature development	3	0.023334	BMP4, MEGF8, APLN
GOTERM_BP_DIRECT	GO:0044458~motile cilium assembly	3	0.0251229	DNAAF3, RSPH9, SPATA6
GOTERM_BP_DIRECT	GO:0030509~BMP signaling pathway	4	0.0334484	BMP4, EGR1, MEGF8, RGMA
GOTERM_BP_DIRECT	GO:0006811~ion transport	5	0.0390818	CHRNA3, CHRNA4, P2RX1, CP, TOMM40L
GOTERM_BP_DIRECT	GO:0060442~branching involved in prostate gland morphogenesis	2	0.0466129	BMP4, FGFR2
GOTERM_BP_DIRECT	GO:0051150~regulation of smooth muscle cell differentiation	2	0.0466129	BMP4, FGFR2
GOTERM_BP_DIRECT	GO:0051601~exocyst localization	2	0.0466129	EXOC3L1, EXOC3L4
GOTERM_CC_DIRECT	GO:0043005~neuron projection	13	0.000232357	CYFIP2, CHRNA3, EPHA10, CHRNA4, OPRL1, STMN3, SYP, SLC6A3, RGMA, GRIP1, VGF, P2RX1, CDK5R2
GOTERM_CC_DIRECT	GO:0005788~endoplasmic reticulum lumen	11	0.000843818	BMP4, SPON1, GANAB, SERPINA1, VGF, COL5A3, CANX, COL5A2, CP, FSTL1, TXNDC5
GOTERM_CC_DIRECT	GO:0005576~extracellular region	33	0.00710029	SNED1, CRB1, FCMR, SERPINA1, EPHA10, SPATA6, FSTL1, ABO, LYPD8, VTN, APOM, PRDX4, DMBT1, HABP4, SPX, TXNDC5, SPINK4, LUM, SPINK5, CP, APLN, BMP4, ADCY10, MMP13, COL5A3, COL5A2, ITGBL1, MASP1, MATN4, FGF11, FGFR2, PAFAH1B2, LTF
GOTERM_CC_DIRECT	GO:0099055~integral component of postsynaptic membrane	4	0.013199	P2RX1, CANX, ADORA1, SLC6A3
GOTERM_CC_DIRECT	GO:0005886~plasma membrane	62	0.0216171	FCMR, B4GALT1, CHRM4, SECTM1, PHF7, SLC6A3, VSIR, SCAMP5, GRIP1, KCNT1, ADORA1, GNRHR, BDKRB2, CD36, TMEM8B, PRKCG, UNC5A, ACTN3, AVPR2, SLC9B1, ANO2, RGMA, APBB1IP, PTP4A3, RAB37, SCN4A, PAFAH1B2, ABCG2, LTF, CRB2, CRB1, CHRNA3, TTYH2, EPHA10, CHRNA4, SDC3, WAS, OPRL1, CORO1A, LYPD8, ART1, HAS3, PLAC4, GPR17, ATP8B2, PLCL1, APOBR, PLEKHA4, GCSAM, CP, TMEM198, NPHS1, MYO1A, P2RX1, CD7, ITGBL1, PL…
GOTERM_CC_DIRECT	GO:0035003~subapical complex	2	0.0287353	CRB2, CRB1
GOTERM_CC_DIRECT	GO:0005794~Golgi apparatus	18	0.0346857	SERPINA1, ST6GALNAC2, B4GALT1, ATP8B2, AVPR2, STMN3, SECTM1, RMDN2, PHF7, FUT2, ABO, GANAB, VGF, RAB37, HABP4, BDKRB2, CD36, FGFR2
GOTERM_CC_DIRECT	GO:0031012~extracellular matrix	7	0.0380246	FCGBP, SPON1, MMP13, DMBT1, LUM, COL5A3, COL5A2
GOTERM_CC_DIRECT	GO:0005588~collagen type V trimer	2	0.0381299	COL5A3, COL5A2
GOTERM_MF_DIRECT	GO:0004435~phosphatidylinositol phospholipase C activity	3	0.0274446	PLCL1, BDKRB2, PLCH2
GOTERM_MF_DIRECT	GO:0008201~heparin binding	6	0.0290161	BMP4, VTN, COL5A3, FSTL1, FGFR2, LTF
GOTERM_MF_DIRECT	GO:0005509~calcium ion binding	14	0.0356752	CRB2, SNED1, CRB1, ACTN3, CALML4, FSTL1, MMP13, CANX, MASP1, PLCH2, MEGF8, RHBDL3, MATN4, PCDHB8
GOTERM_MF_DIRECT	GO:0005201~extracellular matrix structural constituent	5	0.0494235	VTN, SPON1, LUM, COL5A3, COL5A2
