# Supplementary material for: PKCiota Inhibits the Ferroptosis of Esophageal Cancer Cells via Suppressing USP14-Mediated Autophagic Degradation of GPX4
Source: Antioxidants (Basel). 2024 Jan 17;13(1):114. doi: 10.3390/antiox13010114 (PMC10812620; doi:10.3390/antiox13010114)
Supplement: Supplementary file 1 [file antioxidants-13-00114-s001.zip › Table S5.xlsx]

## Sheet: Table S5
Table S5. KEGG pathway analysis of differentially expressed genes after GPX4 knockdown in ESCC cells
Category	Term	Count	p Value	Genes
KEGG_PATHWAY	hsa04080:Neuroactive ligand-receptor interaction	12	0.00204345	CHRNA3, VGF, CHRNA4, CHRM4, P2RX1, AVPR2, BDKRB2, ADORA1, OPRL1, GNRHR, SPX, APLN
KEGG_PATHWAY	hsa00601:Glycosphingolipid biosynthesis - lacto and neolacto series	3	0.0354633	B4GALT1, FUT2, ABO
