# Supplementary material for: PKCiota Inhibits the Ferroptosis of Esophageal Cancer Cells via Suppressing USP14-Mediated Autophagic Degradation of GPX4
Source: Antioxidants (Basel). 2024 Jan 17;13(1):114. doi: 10.3390/antiox13010114 (PMC10812620; doi:10.3390/antiox13010114)
Supplement: Supplementary file 1 [file antioxidants-13-00114-s001.zip › Table S6.xlsx]

## Sheet: Table S6
Table S6. Identification of hub genes at the downstream of GPX4 in ESCC using cytoscape software
MCC			Degree
Rank	Name	Score	Rank	Name	Score
1	SOX2	17	1	SOX2	11
2	BMP4	14	2	BMP4	8
3	FGFR2	8	3	WAS	6
4	SERPINA1	7	3	SERPINA1	6
4	EGR1	7	3	VTN	6
6	WAS	6	3	EGR1	6
6	VTN	6	7	CANX	5
6	FGF11	6	7	LUM	5
9	CANX	5	7	FGFR2	5
9	LUM	5	7	CHRNA4	5
