# Supplementary material for: PKCiota Inhibits the Ferroptosis of Esophageal Cancer Cells via Suppressing USP14-Mediated Autophagic Degradation of GPX4
Source: Antioxidants (Basel). 2024 Jan 17;13(1):114. doi: 10.3390/antiox13010114 (PMC10812620; doi:10.3390/antiox13010114)
Supplement: Supplementary file 1 [file antioxidants-13-00114-s001.zip › Table S7.xlsx]

## Sheet: Table S7
Table S7. Correlation analysis between PKCiota positive expression and GPX4 positive expression in ESCC samples
		GPX4		R	p value
		Positive	Negative
PKCiota	Positive	14	8	0.6427	< 0.0001
	Negative	1	25
