# Supplementary material for: PKCiota Inhibits the Ferroptosis of Esophageal Cancer Cells via Suppressing USP14-Mediated Autophagic Degradation of GPX4
Source: Antioxidants (Basel). 2024 Jan 17;13(1):114. doi: 10.3390/antiox13010114 (PMC10812620; doi:10.3390/antiox13010114)
Supplement: Supplementary file 1 [file antioxidants-13-00114-s001.zip › Table S8.xlsx]

## Sheet: Table S8
Table S8. Correlation analysis between the co-expression of PKCiota and GPX4 and clinical parameters of ESCC patients
New parameter		PKCiota and GPX4
		Positive	Negative	p value
Gender				0.2942
	Male	8	26
	Female	6	8
Age				0.1032
	≤60	6	24
	>60	8	10
pT				0.0812
	T1-2	1	11
	T3-4	13	23
pN				0.4692
	N0	12	25
	N1	2	9
Stage				0.2501
	0-1	13	26
	2	1	8
Grade				0.1713
	1-2	12	21
	3	2	13
