# Supplementary figures and images for: PKCiota Inhibits the Ferroptosis of Esophageal Cancer Cells via Suppressing USP14-Mediated Autophagic Degradation of GPX4
Source: MDPI journal article supplement (doi:10.3390/antiox13010114), 2024-01-17

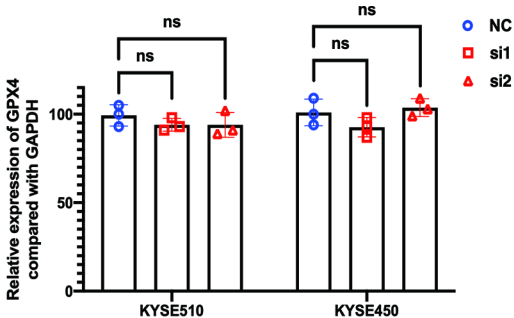

Supplement: s1 [file s1]

**GSE43732**

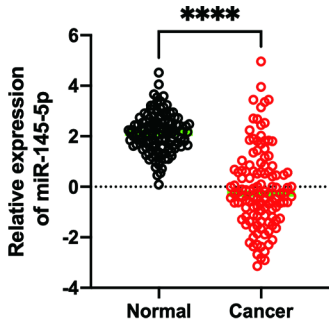

**GSE114110**

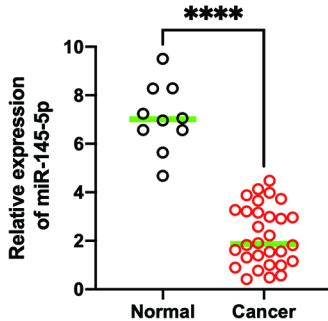

**GSE145198**

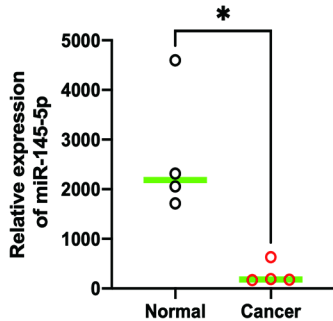

Supplement: s1 [file s1]

**KYSE510**

**KYSE450**

**0 10 20 40**

**0 10 20 40**

**(FIN56,  $\mu$ M)**

**74kDa**

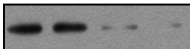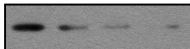

**PKCιota**

**36kDa**

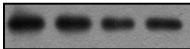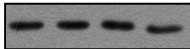

**GAPDH**

**0 20 40 80**

**0 20 40 80**

**(Erastin,  $\mu$ M)**

**74kDa**

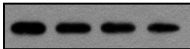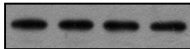

**PKCιota**

**36kDa**

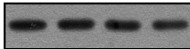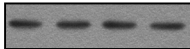

**GAPDH**

Supplement: s1 [file s1]

Relative expression of PKCιota  
compared with GAPDH

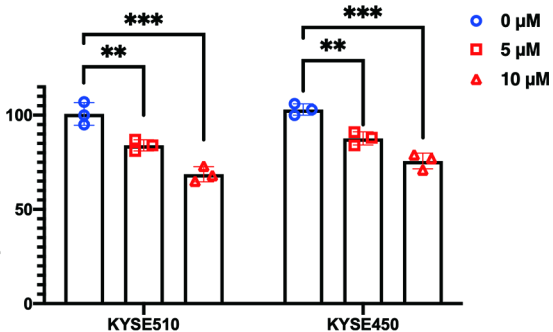

Supplement: s1 [file s1]
